# Supplementary material for: Porous ionic liquids based on biocompatible CD-MOFs
Source: Royal Society of Chemistry journal article supplement (doi:10.1039/d5cc00489f), 2025-01-01
Supplement: d5cc00489f1.pdf [file d5cc00489f1.pdf]

# Porous ionic liquids based on biocompatible CD-MOFs

Cintia M. Correa,<sup>†,‡</sup> Jocasta Avila,<sup>†</sup> Tracy El Achkar,<sup>¶</sup> Pauline André,<sup>¶</sup> Shi-Minh Loo,<sup>§,‡</sup> Stéphane Baudron,<sup>¶</sup> François-Xavier Legrand,<sup>§</sup> Sophie Fourmentin,<sup>‡</sup> and  
Margarida Costa Gomes<sup>\*,†</sup>

<sup>†</sup>*Laboratoire de Chimie de l'ENS Lyon, CNRS and Université de Lyon, 46 allée d'Italie,  
69364 Lyon, France*

<sup>‡</sup>*Unité de Chimie Environnementale et Interactions sur le Vivant, UCEIV, UR 4492,  
Université du Littoral-Côte d'Opale, 145 avenue Maurice Schumann, 59140 Dunkerque,  
France*

<sup>¶</sup>*Laboratoire de Chimie de la Matière Complexe, UMR 7140, Institut Le Bel, 4 rue Blaise,  
67081 Strasbourg, France*

<sup>§</sup>*Université Paris-Saclay, CNRS, Institut Galien Paris-Saclay, 91400 Orsay, France*

E-mail: [margarida.costa-gomes@ens-lyon.fr](mailto:margarida.costa-gomes@ens-lyon.fr)

## Supplementary Information

## Preparation of CD-MOFs

**CD-MOF-1**  $\gamma$ -CD (1.30 g, 1 mmol) and KOH (450 mg, 8 mmol) were dissolved in H<sub>2</sub>O (20 mL). The aqueous solution was filtered and MeOH (50 mL) was allowed to vapor diffuse into the solution. After 4 days, colorless cubic crystals, suitable for X-ray crystallographic analysis, were isolated, filtered, washed with isopropanol, and dried at 50 °C overnight before being stored in a desiccator (1.5 g, 87%). TGA analysis shows a first weight loss of 18% corresponding to the loss of water and alcohol solvate molecules. Subsequent weight loss above 250 °C corresponds to decomposition of the material. Elemental analysis (CHN) was performed on a fully dried sample. Calcd. for (KOH)<sub>2</sub>C<sub>48</sub>H<sub>80</sub>O<sub>40</sub>: C, 40.90; H, 5.86. Found: C, 40.29; H, 6.18.

**CD-MOF-2**  $\gamma$ -CD (1.30 g, 1 mmol) and RbOH (820 mg, 8 mmol) were dissolved in H<sub>2</sub>O (20 mL). The aqueous solution was filtered and MeOH (50 mL) was allowed to vapor diffuse into the solution. After 4 days, colorless cubic crystals, suitable for X-ray crystallographic analysis, were isolated, filtered, washed with isopropanol, and dried at 50 °C overnight before being stored in a desiccator (1.5 g, 86%). TGA analysis shows a first weight loss of 13% corresponding to the loss water and alcohol solvate molecules. Subsequent weight loss above 250 °C corresponds to decomposition of the material. Elemental analysis (CHN) was performed on a fully dried sample. Calcd. for (RbOH)<sub>2</sub>C<sub>48</sub>H<sub>80</sub>O<sub>40</sub>: C, 38.38; H, 5.50. Found: C, 38.10; H, 5.79.

## Characterization of CD-MOFs

### X-Ray Diffraction

Powder X-ray diffraction patterns were recorded at 293 K on a Bruker D8 diffractometer using monochromatic Cu-K $\alpha$  radiation with a scanning range between 4 and 40°, with the compound placed on a rotating Si low background sample holder. The calculated diagrams were generated with the Mercury® software based on reported single-crystal data.

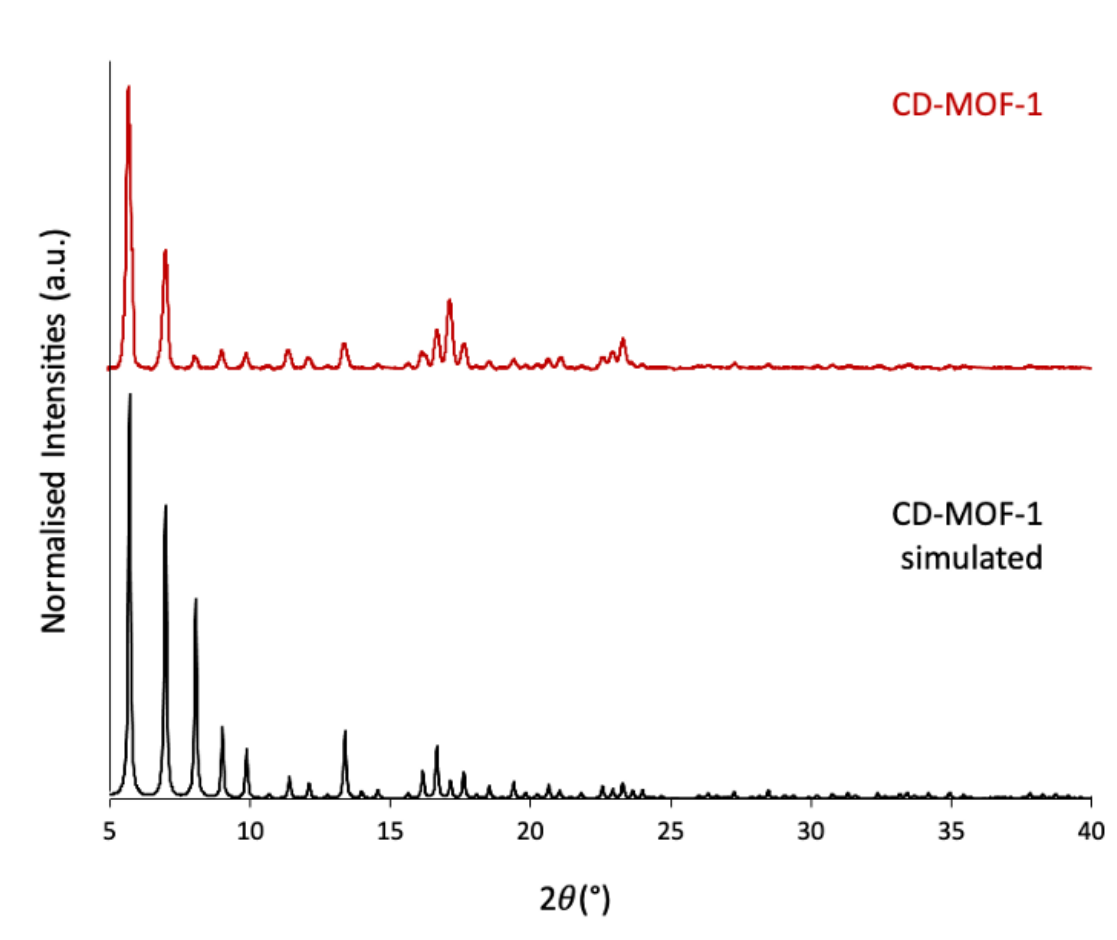

Figure S1: Powder X-Ray Diffraction of CD-MOF-1

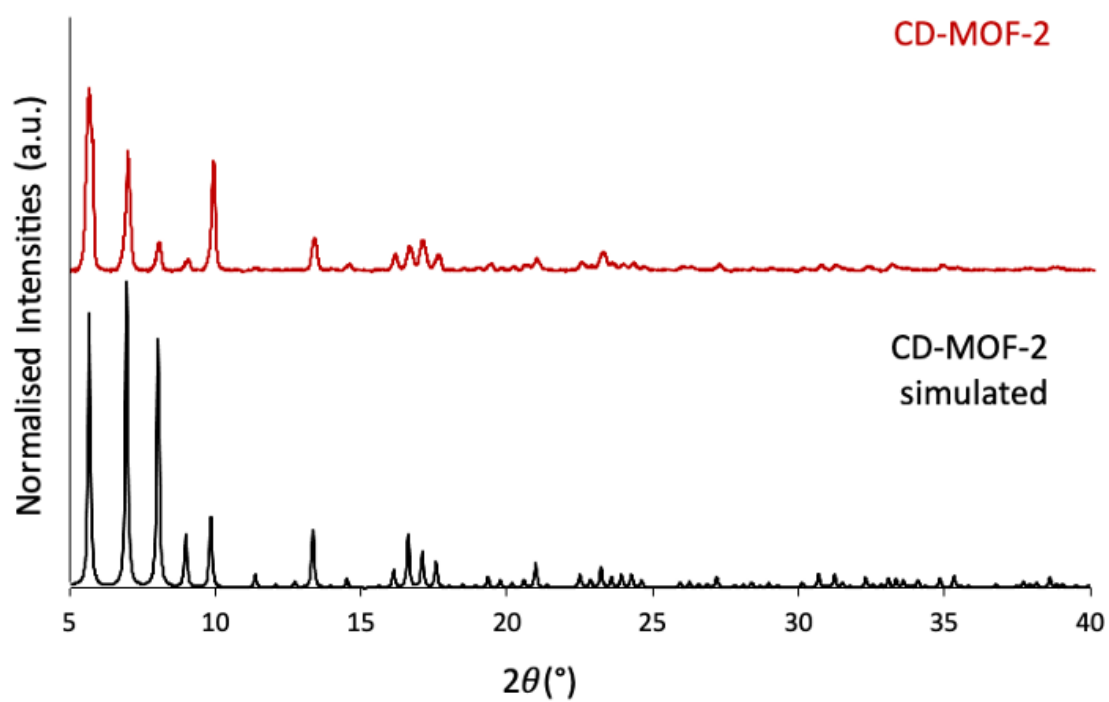

Figure S2: Powder X-Ray Diffraction of CD-MOF-2

## Thermogravimetric analysis

The thermal stability of the samples was determined on a PerkinElmer thermogravimetric analyzer TGA 4000 under N<sub>2</sub> flow of 20 mL.min<sup>-1</sup> and at a heating rate of 5 °C.min<sup>-1</sup> up to 800 °C.

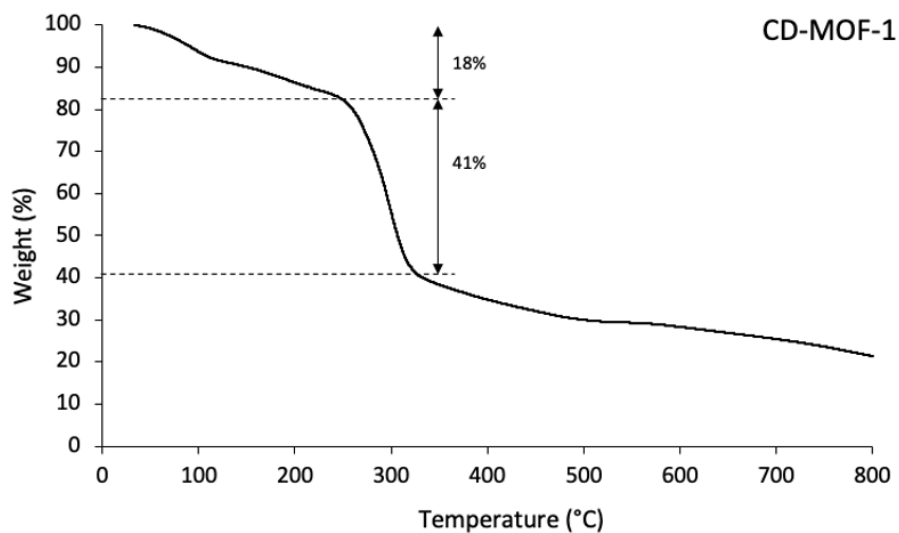

Figure S3: TGA of CD-MOF-1

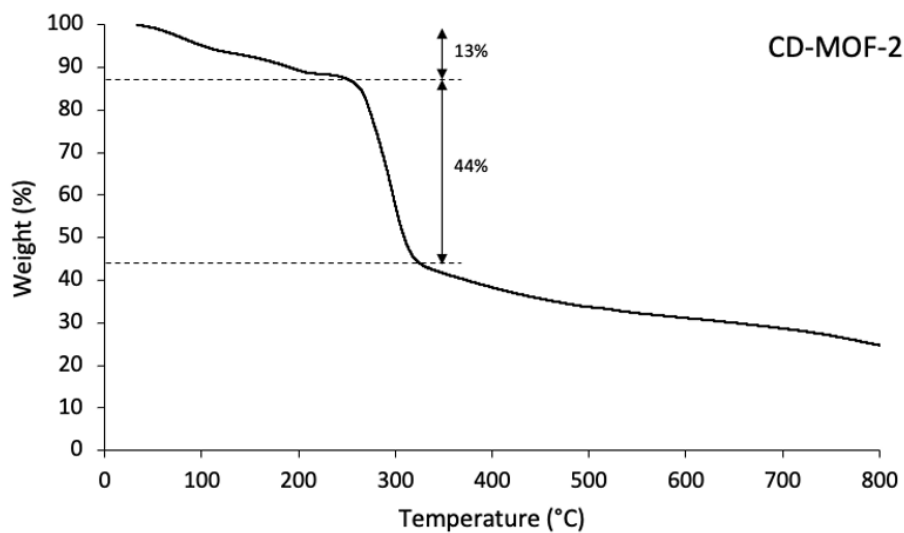

Figure S4: TGA of CD-MOF-2

### Brunauer-Emmett-Teller (BET)

The textural properties of the samples were obtained by N<sub>2</sub> adsorption-desorption isotherms at 77 K, in a Micromeritics ASAP 2020 Surface Area and Porosity Analyzer. The Brunauer-Emmett-Teller (BET) method was used for obtaining the total specific surface area (SBET) and the pore size (model: NLDFT for cylinder pores). The samples were activated, prior to the N<sub>2</sub> adsorption-desorption analysis, first by three soaking in fresh CH<sub>2</sub>Cl<sub>2</sub> for 24 h each, followed by heating the sample under vacuum at 50 °C for 12 h. The MicroActive Software version 4.00 was used to analyze the data.

Table S1: Brunauer-Emmett-Teller (BET).

| MOF                                         | CD-MOF-1  | CD-MOF-2 |
|---------------------------------------------|-----------|----------|
| <b>BET Surface Area (m<sup>2</sup>/g)</b>   | 1024 ± 13 | 775 ± 10 |
| <b>C value</b>                              | 507       | 535      |
| <b>Correlation Coefficient</b>              | 0.9996    | 0.9996   |
| <b>Total Pore Volume (cm<sup>3</sup>/g)</b> | 0.3805    | 0.2874   |

### Elemental Analysis

Elemental analyses (CHN) were performed at the Service Commun d'Analyses of the University of Strasbourg, in duplicate, employing a ThermoFischer Flash 2000 equipment.

Table S2: Elemental Analysis of CD-MOF-1.

| Sample                    | %N   | %C   | %H   |
|---------------------------|------|------|------|
| <b>CD-MOF-1</b>           | 0.00 | 40.0 | 6.15 |
|                           | 0.00 | 40.6 | 6.22 |
| <b>Theoretical values</b> | 0.00 | 40.9 | 5.86 |

Table S3: Elemental Analysis of CD-MOF-2.

| Sample             | %N   | %C   | %H   |
|--------------------|------|------|------|
| CD-MOF-2           | 0.00 | 38.3 | 5.78 |
|                    | 0.00 | 37.9 | 5.81 |
| Theoretical values | 0.00 | 38.4 | 5.50 |

## Preparation of porous ionic liquids

The ionic liquids  $[P_{6,6,6,14}][NTf_2]$ , trihexyltetradecylphosphonium bis(trifluoromethylsulfonyl)imide was supplied by Iolitec with purity  $>98\%$ . Preparation and characterization of the porous materials, CD-MOF-1 and CD-MOF-2, are detailed above.

Carbon dioxide,  $CO_2$  was purchased from Messer with a mole fraction purity of 99.995 % from Air Liquide. The gas was used as received.

The PoILs, i.e. suspensions of CD-MOF-1 and CD-MOF-2 in  $[P_{6,6,6,14}][NTf_2]$  were prepared at room temperature by weighing the components using a Mettler Toledo New Classic MS balance with an accuracy of  $\pm 0.01$  mg, and by stirring the mixture at 500–600 rpm during 5 minutes at room temperature. Humidity can influence the structure of CD-MOFs, all samples were prepared and kept in an inert atmosphere in a glovebox containing argon.

Table S4: Sample nomenclature and composition used in the gas absorption measurements.

| Sample                            | $m_{\text{liquid}}$ (g) | $m_{\text{CD-MOF}}$ (g) | MOF %w/w |
|-----------------------------------|-------------------------|-------------------------|----------|
| $[P_{6,6,6,14}][NTf_2]$           |                         |                         |          |
| $[P_{6,6,6,14}][NTf_2]$ +CD-MOF-1 | 2.9021                  | 0.14415                 | 4.8706   |
| $[P_{6,6,6,14}][NTf_2]$ +CD-MOF-2 | 2.8398                  | 0.14212                 | 4.9779   |

## Density measurements

The densities of the samples were measured in an Anton Paar DMA 5000M densimeter, in the temperature range 293–353 K at atmospheric pressure. The densimeter’s working measurement is described in our previous works.<sup>1</sup> The maximum temperature deviation in the density measurements was  $\pm 0.01^\circ\text{C}$ .

The knowledge of the densities of the liquid phases are essential to calculate the gas absorption values.

Table S5: Experimental densities of the PoILs  $[\text{P}_{6,6,6,14}][\text{NTf}_2] + \text{CD-MOF-1}$  or  $\text{CD-MOF-2}$  5 % w/w, in the temperature range 293–353 K. The deviations indicated are relative to the fitting polynomials with coefficients listed in Table S6

| $T/\text{K}$                                            | $\rho/\text{g cm}^{-3}$ | $\delta/\%$ | $T/\text{K}$                                            | $\rho/\text{g cm}^{-3}$ | $\delta/\%$ |
|---------------------------------------------------------|-------------------------|-------------|---------------------------------------------------------|-------------------------|-------------|
| $[\text{P}_{6,6,6,14}][\text{NTf}_2] + \text{CD-MOF-1}$ |                         |             | $[\text{P}_{6,6,6,14}][\text{NTf}_2] + \text{CD-MOF-2}$ |                         |             |
| 293.15                                                  | 1.0769                  | −0.02       | 293.15                                                  | 1.0869                  | −0.01       |
| 298.15                                                  | 1.0734                  | −0.01       | 298.15                                                  | 1.0833                  | −0.01       |
| 303.15                                                  | 1.0699                  | +0.00       | 303.15                                                  | 1.0797                  | +0.00       |
| 313.15                                                  | 1.0628                  | +0.01       | 313.15                                                  | 1.0726                  | +0.01       |
| 323.15                                                  | 1.0559                  | +0.02       | 323.15                                                  | 1.0655                  | +0.02       |
| 333.15                                                  | 1.0490                  | +0.02       | 333.15                                                  | 1.0584                  | +0.02       |
| 343.15                                                  | 1.0423                  | +0.00       | 343.15                                                  | 1.0515                  | +0.01       |
| 353.15                                                  | 1.0358                  | −0.03       | 353.15                                                  | 1.0449                  | −0.03       |

Table S6: Parameters  $A_0$  and  $A_1$  from linear functions used to fit the experimental densities,  $\rho = A_0 + A_1T$ , as a function of temperature and absolute average deviation (AAD)

| Sample                                                                                                                           | $A_0/\text{g cm}^{-3}$ | $A_1/\text{g cm}^{-3} \text{ K}^{-1}$ | AAD/% |
|----------------------------------------------------------------------------------------------------------------------------------|------------------------|---------------------------------------|-------|
| $[\text{P}_{6,6,6,14}][\text{NTf}_2] + \text{CD-MOF-1}$                                                                          | 1.27825                | $-6.87464 \times 10^{-4}$             | 0.02  |
| $[\text{P}_{6,6,6,14}][\text{NTf}_2] + \text{CD-MOF-2}$                                                                          | 1.29266                | $-7.02486 \times 10^{-4}$             | 0.01  |
| $\text{AAD} = \frac{100}{N} \sum_{i=1}^N \left( \frac{ \rho_{\text{exp}_i} - \rho_{\text{cal}_i} }{\rho_{\text{cal}_i}} \right)$ |                        |                                       |       |



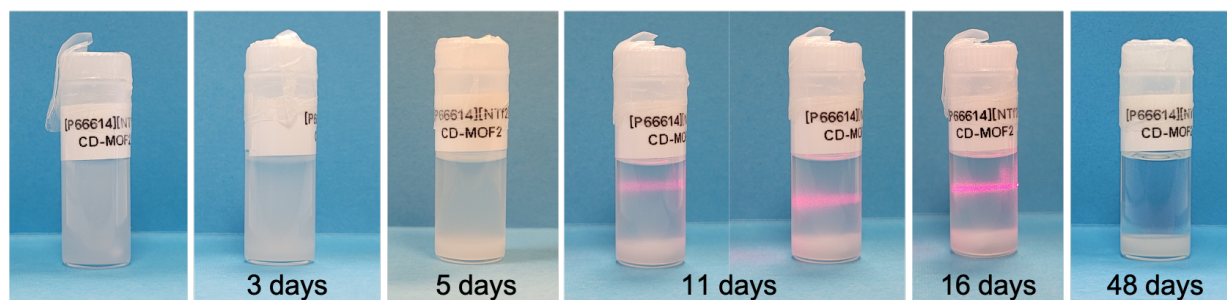

Figure S5: Visual appearance of PoIL prepared with CD-MOF-2 within 48 days and *Tyndall* Effect.

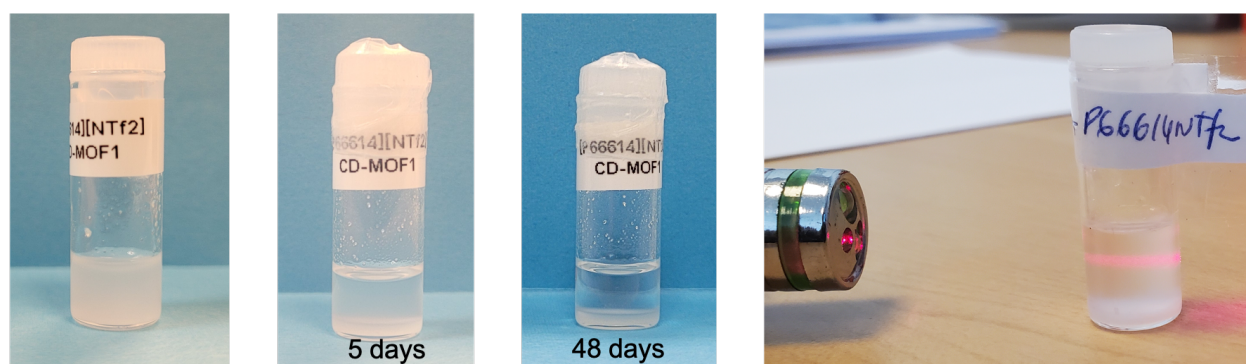

Figure S6: Visual appearance of PoIL prepared with CD-MOF-1 within 48 days and *Tyndall* Effect.

## Gas absorption data

The gas absorption measurements were performed gravimetrically using an Intelligent Gravimetric Analyzer (IGA001) microbalance. The working principle and the data treatment are well described in our previous works.<sup>1,2</sup>

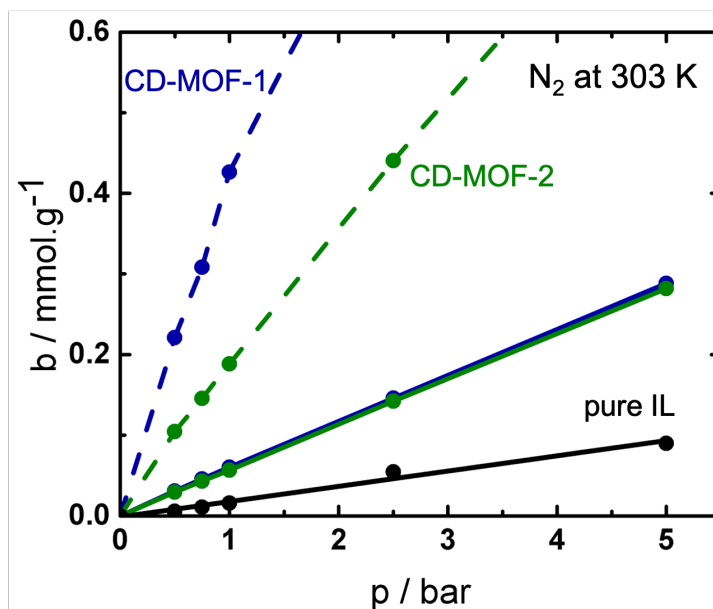

Figure S7: Absorption of N<sub>2</sub> in pure [P<sub>6,6,6,14</sub>][NTf<sub>2</sub>], in the solid CD-MOFs and in the suspensions at 303 K and up to 5 bar. Differences in the absorption of solids (CD-MOF-1 and CD-MOF-2) may be related to exposure to atmospheric humidity. However, these differences are not observed when the solids are mixed with the ionic liquid, forming the PoILs. It might be due to the hydrophobicity of the liquid that keeps the CD-MOFs protected from humidity.

Table S7: Raw data (weight, pressure, and temperature) of absorption and desorption of CO<sub>2</sub> and N<sub>2</sub> by the pure IL, the porous liquid IL+CD-MOFs, and the porous solids as a function of pressure from 0.5–5 bar at 303.15 K.

| $\frac{T}{\text{K}}$                        | $\frac{p}{\text{bar}}$ | $\frac{w}{\text{mg}}$ | $\frac{T}{\text{K}}$                                 | $\frac{p}{\text{bar}}$ | $\frac{w}{\text{mg}}$ | $\frac{T}{\text{K}}$ | $\frac{p}{\text{bar}}$ | $\frac{w}{\text{mg}}$ |
|---------------------------------------------|------------------------|-----------------------|------------------------------------------------------|------------------------|-----------------------|----------------------|------------------------|-----------------------|
| N <sub>2</sub> — Absorption                 |                        |                       |                                                      |                        |                       |                      |                        |                       |
| [P <sub>6,6,6,14</sub> ][NTf <sub>2</sub> ] |                        |                       | [P <sub>6,6,6,14</sub> ][NTf <sub>2</sub> ]+CD-MOF-1 |                        |                       | CD-MOF-1             |                        |                       |
| 302.86                                      | 0.0000                 | 101.7154              | 303.13                                               | 0.0000                 | 45.64417              | 301.16               | 0.0000                 | 16.51253              |
| 303.14                                      | 0.4994                 | 101.6683              | 303.14                                               | 0.4984                 | 45.63413              | 303.09               | 0.4989                 | 16.59330              |
| 303.15                                      | 0.7481                 | 101.6503              | 303.17                                               | 0.7487                 | 45.62917              | 303.13               | 0.7487                 | 16.62369              |
| 303.15                                      | 0.9983                 | 101.6313              | 303.17                                               | 0.9991                 | 45.62401              | 303.13               | 0.9992                 | 16.66830              |
| 303.14                                      | 2.4876                 | 101.5166              | 303.15                                               | 2.4999                 | 45.58899              | 303.15               | 2.5002                 | 16.79178              |
| 303.16                                      | 4.9855                 | 101.3244              | 303.15                                               | 4.9991                 | 45.52998              | 303.09               | 4.9987                 | 16.92239              |
| N <sub>2</sub> — Desorption                 |                        |                       |                                                      |                        |                       |                      |                        |                       |
| 303.16                                      | 4.9855                 | 101.3244              | 303.15                                               | 4.9991                 | 45.52998              | 303.09               | 0.4998                 | 16.92239              |
| 303.15                                      | 2.4985                 | 101.5823              | 303.15                                               | 2.4999                 | 45.59145              | 303.14               | 0.2498                 | 16.76348              |
| 303.14                                      | 0.9976                 | 101.6355              | 303.13                                               | 0.9975                 | 45.62661              | 303.14               | 0.9993                 | 16.64396              |
| 303.13                                      | 0.7479                 | 101.6532              | 303.17                                               | 0.7481                 | 45.63044              | 303.15               | 0.7487                 | 16.61706              |
| 303.14                                      | 0.4989                 | 101.6715              | 303.17                                               | 0.4978                 | 45.63480              | 303.16               | 0.4982                 | 16.58297              |
| 302.86                                      | 0.0000                 | 101.7154              | 303.09                                               | 0.0000                 | 45.64627              | 303.16               | 0.0000                 | 16.38809              |
| N <sub>2</sub> — Absorption                 |                        |                       |                                                      |                        |                       |                      |                        |                       |
| [P <sub>6,6,6,14</sub> ][NTf <sub>2</sub> ] |                        |                       | [P <sub>6,6,6,14</sub> ][NTf <sub>2</sub> ]+CD-MOF-2 |                        |                       | CD-MOF-2             |                        |                       |
| 303.15                                      | 0.0000                 | 101.7154              | 303.16                                               | 0.0000                 | 46.56039              | 302.82               | 0.0000                 | 17.73426              |
| 303.15                                      | 0.4992                 | 101.6683              | 303.13                                               | 0.4986                 | 46.54882              | 303.16               | 0.4971                 | 17.76495              |
| 303.16                                      | 0.7480                 | 101.6503              | 303.15                                               | 0.7489                 | 46.54233              | 303.15               | 0.7484                 | 17.77525              |
| 303.13                                      | 0.9979                 | 101.6313              | 303.15                                               | 0.9996                 | 46.53563              | 303.15               | 0.9993                 | 17.78648              |
| 303.14                                      | 2.4930                 | 101.5166              | 303.13                                               | 2.4997                 | 46.50187              | 303.14               | 2.4991                 | 17.85199              |
| 303.15                                      | 4.9855                 | 101.3244              | 303.12                                               | 4.9993                 | 46.44120              | 303.12               | 4.9998                 | 17.94341              |
| N <sub>2</sub> — Desorption                 |                        |                       |                                                      |                        |                       |                      |                        |                       |
| 303.00                                      | 4.9855                 | 101.3244              | 303.12                                               | 4.9993                 | 46.44120              | 303.12               | 4.9998                 | 17.94341              |
| 303.23                                      | 2.4985                 | 101.5823              | 303.16                                               | 2.4997                 | 46.50245              | 303.17               | 2.4994                 | 17.85682              |
| 303.15                                      | 0.9976                 | 101.6355              | 303.15                                               | 0.9993                 | 46.53816              | 303.15               | 0.9989                 | 17.79649              |
| 303.15                                      | 0.7479                 | 101.6532              | 303.14                                               | 0.7492                 | 46.54286              | 303.14               | 0.7478                 | 17.78370              |
| 303.14                                      | 0.4989                 | 101.6715              | 303.14                                               | 0.4964                 | 46.54813              | 303.15               | 0.4972                 | 17.76991              |
| 303.15                                      | 0.0000                 | 101.7154              | 303.13                                               | 0.0000                 | 46.55737              | 303.22               | 0.0000                 | 17.67799              |
| CO <sub>2</sub> — Absorption                |                        |                       |                                                      |                        |                       |                      |                        |                       |
| [P <sub>6,6,6,14</sub> ][NTf <sub>2</sub> ] |                        |                       | [P <sub>6,6,6,14</sub> ][NTf <sub>2</sub> ]+CD-MOF-1 |                        |                       | CD-MOF-1             |                        |                       |
| 303.00                                      | 0.0000                 | 128.88670             | 303.25                                               | 0.0000                 | 45.62257              | 301.48               | 0.0000                 | 16.41806              |
| 303.23                                      | 0.4988                 | 128.95140             | 303.10                                               | 0.4974                 | 45.68840              | 303.13               | 0.4992                 | 17.74340              |
| 303.15                                      | 0.7492                 | 128.98090             | 303.14                                               | 0.7487                 | 45.70604              | 303.14               | 0.7488                 | 17.90193              |
| 303.15                                      | 0.9986                 | 129.00890             | 303.17                                               | 0.9995                 | 45.72464              | 303.15               | 0.9995                 | 18.04168              |

| $\frac{T}{\text{K}}$                        | $\frac{p}{\text{bar}}$ | $\frac{w}{\text{mg}}$ | $\frac{T}{\text{K}}$                                 | $\frac{p}{\text{bar}}$ | $\frac{w}{\text{mg}}$ | $\frac{T}{\text{K}}$ | $\frac{p}{\text{bar}}$ | $\frac{w}{\text{mg}}$ |
|---------------------------------------------|------------------------|-----------------------|------------------------------------------------------|------------------------|-----------------------|----------------------|------------------------|-----------------------|
| 303.14                                      | 2.4977                 | 129.18070             | 303.14                                               | 2.4996                 | 45.82797              | 303.15               | 2.4992                 | 18.64202              |
| 303.15                                      | 4.9967                 | 129.46350             | 303.16                                               | 4.9989                 | 46.00154              | 303.14               | 4.9982                 | 19.30632              |
| CO <sub>2</sub> — Desorption                |                        |                       |                                                      |                        |                       |                      |                        |                       |
| 303.00                                      | 4.9969                 | 129.46350             | 303.25                                               | 4.9989                 | 46.00154              | 301.48               | 4.9982                 | 19.30632              |
| 303.23                                      | 2.4986                 | 129.18230             | 303.10                                               | 2.4989                 | 45.83327              | 303.13               | 2.4996                 | 18.64976              |
| 303.15                                      | 0.9978                 | 129.00920             | 303.14                                               | 0.9989                 | 45.72985              | 303.14               | 0.9996                 | 18.04326              |
| 303.15                                      | 0.7485                 | 128.98290             | 303.17                                               | 0.7492                 | 45.71085              | 303.15               | 0.7486                 | 17.90874              |
| 303.14                                      | 0.4992                 | 128.95370             | 303.14                                               | 0.4978                 | 45.69051              | 303.15               | 0.4977                 | 17.75323              |
| 303.15                                      | 0.0000                 | 128.89460             | 303.16                                               | 0.0000                 | 45.63700              | 303.14               | 0.0000                 | 16.43721              |
| CO <sub>2</sub> — Absorption                |                        |                       |                                                      |                        |                       |                      |                        |                       |
| [P <sub>6,6,6,14</sub> ][NTf <sub>2</sub> ] |                        |                       | [P <sub>6,6,6,14</sub> ][NTf <sub>2</sub> ]+CD-MOF-2 |                        |                       | CD-MOF-2             |                        |                       |
| 303.00                                      | 0.0000                 | 128.8867              | 304.59                                               | 0.0000                 | 46.56500              | 303.15               | 0.0000                 | 17.68342              |
| 303.23                                      | 0.4988                 | 128.9514              | 303.15                                               | 0.4979                 | 46.61488              | 303.00               | 0.4988                 | 18.95492              |
| 303.15                                      | 0.7492                 | 128.9809              | 303.23                                               | 0.7485                 | 46.63582              | 303.00               | 0.7473                 | 19.09983              |
| 303.15                                      | 0.9986                 | 129.0089              | 303.08                                               | 0.9996                 | 46.65155              | 303.00               | 0.9993                 | 19.22803              |
| 303.14                                      | 2.4977                 | 129.1807              | 303.15                                               | 2.5002                 | 46.75248              | 303.00               | 2.4991                 | 19.77927              |
| 303.15                                      | 4.9967                 | 129.4635              | 303.14                                               | 4.9977                 | 46.92136              | 303.00               | 4.9995                 | 20.40701              |
| CO <sub>2</sub> — Desorption                |                        |                       |                                                      |                        |                       |                      |                        |                       |
| 303.00                                      | 4.9969                 | 129.46350             | 303.25                                               | 4.9977                 | 46.92136              | 301.48               | 4.9995                 | 20.40701              |
| 303.23                                      | 2.4986                 | 129.18230             | 303.10                                               | 2.4988                 | 46.75712              | 303.13               | 2.4981                 | 19.78957              |
| 303.15                                      | 0.9979                 | 129.00920             | 303.14                                               | 0.9988                 | 46.65526              | 303.14               | 0.9984                 | 19.23787              |
| 303.15                                      | 0.7485                 | 128.98290             | 303.17                                               | 0.7489                 | 46.63624              | 303.15               | 0.7480                 | 19.10711              |
| 303.14                                      | 0.4992                 | 128.95370             | 303.14                                               | 0.4985                 | 46.61640              | 303.15               | 0.4982                 | 18.96093              |
| 303.15                                      | 0.0000                 | 128.89460             | 303.16                                               | 0.0000                 | 46.56177              | 303.14               | 0.0000                 | 17.76147              |

Table S8: Absorption and desorption ( $b$  in mmol/g) of CO<sub>2</sub> and N<sub>2</sub> by the pure IL, the porous liquid IL+CD-MOFs, and the porous solids as a function of pressure from 0.5–5 bar at 303.15 K.

| $\frac{T}{\text{K}}$                        | $\frac{p}{\text{bar}}$ | $\frac{b}{\text{mmol g}^{-1}}$ | $\frac{T}{\text{K}}$                                 | $\frac{p}{\text{bar}}$ | $\frac{b}{\text{mmol g}^{-1}}$ | $\frac{T}{\text{K}}$ | $\frac{p}{\text{bar}}$ | $\frac{b}{\text{mmol g}^{-1}}$ |
|---------------------------------------------|------------------------|--------------------------------|------------------------------------------------------|------------------------|--------------------------------|----------------------|------------------------|--------------------------------|
| N <sub>2</sub> — Absorption                 |                        |                                |                                                      |                        |                                |                      |                        |                                |
| [P <sub>6,6,6,14</sub> ][NTf <sub>2</sub> ] |                        |                                | [P <sub>6,6,6,14</sub> ][NTf <sub>2</sub> ]+CD-MOF-1 |                        |                                | CD-MOF-1             |                        |                                |
| 302.86                                      | 0.0000                 | 0.00000                        | 303.13                                               | 0.0000                 | 0.00000                        | 303.16               | 0.0000                 | 0.00000                        |
| 303.14                                      | 0.4994                 | 0.00519                        | 303.14                                               | 0.4984                 | 0.03081                        | 303.09               | 0.4989                 | 0.22096                        |
| 303.15                                      | 0.7481                 | 0.01024                        | 303.17                                               | 0.7487                 | 0.04574                        | 303.13               | 0.7487                 | 0.30822                        |
| 303.15                                      | 0.9983                 | 0.01501                        | 303.17                                               | 0.9991                 | 0.06053                        | 303.13               | 0.9992                 | 0.42627                        |
| 303.14                                      | 2.4877                 | 0.04286                        | 303.15                                               | 2.4999                 | 0.14606                        | 303.15               | 2.5002                 | 0.82279                        |
| 303.16                                      | 4.9855                 | 0.08968                        | 303.15                                               | 4.9991                 | 0.28820                        | 303.09               | 4.9987                 | 1.32106                        |
| N <sub>2</sub> — Desorption                 |                        |                                |                                                      |                        |                                |                      |                        |                                |
| 303.16                                      | 4.9855                 | 0.08968                        | 303.15                                               | 4.9991                 | 0.28820                        | 303.09               | 4.9987                 | 1.32106                        |
| 303.15                                      | 2.4984                 | 0.06641                        | 303.15                                               | 2.4999                 | 0.14798                        | 303.14               | 2.4989                 | 0.76151                        |
| 303.14                                      | 0.9976                 | 0.01646                        | 303.13                                               | 0.9975                 | 0.06245                        | 303.14               | 0.9993                 | 0.37366                        |
| 303.13                                      | 0.7479                 | 0.01126                        | 303.17                                               | 0.74815                | 0.04669                        | 303.15               | 0.7487                 | 0.29388                        |
| 303.14                                      | 0.4989                 | 0.00630                        | 303.17                                               | 0.4978                 | 0.03128                        | 303.16               | 0.4982                 | 0.19857                        |
| 302.86                                      | 0.0000                 | 0.00000                        | 303.08                                               | 0.0000                 | 0.00000                        | 303.16               | 0.0000                 | 0.00000                        |
| N <sub>2</sub> — Absorption                 |                        |                                |                                                      |                        |                                |                      |                        |                                |
| [P <sub>6,6,6,14</sub> ][NTf <sub>2</sub> ] |                        |                                | [P <sub>6,6,6,14</sub> ][NTf <sub>2</sub> ]+CD-MOF-2 |                        |                                | CD-MOF-2             |                        |                                |
| 303.15                                      | 0.0000                 | 0.0000                         | 303.16                                               | 0.0000                 | 0.00000                        | 302.82               | 0.0000                 | 0.00000                        |
| 303.15                                      | 0.4992                 | 0.0057                         | 303.13                                               | 0.4986                 | 0.02935                        | 303.16               | 0.4971                 | 0.10469                        |
| 303.16                                      | 0.7480                 | 0.0107                         | 303.15                                               | 0.7489                 | 0.04298                        | 303.15               | 0.7484                 | 0.14556                        |
| 303.13                                      | 0.9979                 | 0.0157                         | 303.15                                               | 0.9996                 | 0.05647                        | 303.15               | 0.9993                 | 0.18828                        |
| 303.14                                      | 2.4930                 | 0.0547                         | 303.13                                               | 2.4997                 | 0.14216                        | 303.14               | 2.4991                 | 0.44040                        |
| 303.15                                      | 4.9855                 | 0.0899                         | 303.12                                               | 4.9993                 | 0.28181                        | 303.12               | 4.9998                 | 0.82512                        |
| N <sub>2</sub> — Desorption                 |                        |                                |                                                      |                        |                                |                      |                        |                                |
| 303.15                                      | 0.0000                 | 0.0000                         | 303.12                                               | 4.9992                 | 0.28181                        | 303.12               | 4.9998                 | 0.82512                        |
| 303.15                                      | 0.4992                 | 0.0057                         | 303.16                                               | 2.4998                 | 0.14259                        | 303.17               | 2.4994                 | 0.45014                        |
| 303.16                                      | 0.7480                 | 0.0107                         | 303.15                                               | 0.9993                 | 0.05839                        | 303.15               | 0.9989                 | 0.20840                        |
| 303.13                                      | 0.9979                 | 0.0157                         | 303.14                                               | 0.7495                 | 0.04340                        | 303.14               | 0.7479                 | 0.16253                        |
| 303.14                                      | 2.4930                 | 0.0547                         | 303.14                                               | 0.4964                 | 0.02865                        | 303.15               | 0.4972                 | 0.11468                        |
| 303.15                                      | 4.9855                 | 0.0899                         | 303.13                                               | 0.0000                 | 0.00000                        | 303.22               | 0.0000                 | 0.00000                        |
| CO <sub>2</sub> — Absorption                |                        |                                |                                                      |                        |                                |                      |                        |                                |
| [P <sub>6,6,6,14</sub> ][NTf <sub>2</sub> ] |                        |                                | [P <sub>6,6,6,14</sub> ][NTf <sub>2</sub> ]+CD-MOF-1 |                        |                                | CD-MOF-1             |                        |                                |
| 303.00                                      | 0.0000                 | 0.00000                        | 303.25                                               | 0.0000                 | 0.00000                        | 301.48               | 0.0000                 | 0.00000                        |
| 303.23                                      | 0.4988                 | 0.03389                        | 303.10                                               | 0.4974                 | 0.06507                        | 303.13               | 0.4992                 | 1.89247                        |
| 303.15                                      | 0.7492                 | 0.04997                        | 303.14                                               | 0.7487                 | 0.08772                        | 303.14               | 0.7488                 | 2.13421                        |
| 303.15                                      | 0.9986                 | 0.06577                        | 303.17                                               | 0.9995                 | 0.11084                        | 303.15               | 0.9995                 | 2.35006                        |

| $\frac{T}{\text{K}}$                      | $\frac{p}{\text{bar}}$ | $\frac{b}{\text{mmol g}^{-1}}$ | $\frac{T}{\text{K}}$                               | $\frac{p}{\text{bar}}$ | $\frac{b}{\text{mmol g}^{-1}}$ | $\frac{T}{\text{K}}$ | $\frac{p}{\text{bar}}$ | $\frac{b}{\text{mmol g}^{-1}}$ |
|-------------------------------------------|------------------------|--------------------------------|----------------------------------------------------|------------------------|--------------------------------|----------------------|------------------------|--------------------------------|
| 303.14                                    | 2.4977                 | 0.16185                        | 303.14                                             | 2.4996                 | 0.24567                        | 303.15               | 2.4992                 | 3.31575                        |
| 303.15                                    | 4.9967                 | 0.32320                        | 303.16                                             | 4.9989                 | 0.4728                         | 303.14               | 4.9982                 | 4.46173                        |
| CO <sub>2</sub> — Desorption              |                        |                                |                                                    |                        |                                |                      |                        |                                |
| 303.15                                    | 4.9969                 | 0.32320                        | 303.22                                             | 4.9989                 | 0.47281                        | 301.48               | 4.9982                 | 4.46173                        |
| 303.15                                    | 2.4986                 | 0.16217                        | 303.12                                             | 2.4989                 | 0.24827                        | 303.13               | 2.4996                 | 3.32651                        |
| 303.16                                    | 0.9979                 | 0.06580                        | 303.14                                             | 0.9989                 | 0.11340                        | 303.14               | 0.9996                 | 2.35226                        |
| 303.13                                    | 0.7485                 | 0.05030                        | 303.14                                             | 0.7493                 | 0.09015                        | 303.15               | 0.7486                 | 2.14360                        |
| 303.14                                    | 0.4992                 | 0.03431                        | 303.13                                             | 0.4978                 | 0.06614                        | 303.15               | 0.4977                 | 1.90593                        |
| 303.15                                    | 0.0000                 | 0.00000                        | 303.16                                             | 0.0000                 | 0.00000                        | 303.14               | 0.0000                 | 0.00000                        |
| CO <sub>2</sub> — Absorption              |                        |                                |                                                    |                        |                                |                      |                        |                                |
| [P <sub>6,6,14</sub> ][NTf <sub>2</sub> ] |                        |                                | [P <sub>6,6,14</sub> ][NTf <sub>2</sub> ]+CD-MOF-2 |                        |                                | CD-MOF-2             |                        |                                |
| 303.00                                    | 0.0000                 | 0.00000                        | 304.59                                             | 0.0000                 | 0.00000                        | 303.15               | 0.0000                 | 0.00000                        |
| 303.23                                    | 0.4988                 | 0.03389                        | 303.15                                             | 0.4979                 | 0.05620                        | 303.00               | 0.4988                 | 1.68779                        |
| 303.15                                    | 0.7492                 | 0.04997                        | 303.23                                             | 0.7485                 | 0.08007                        | 303.00               | 0.7473                 | 1.89461                        |
| 303.15                                    | 0.9986                 | 0.06577                        | 303.08                                             | 0.9996                 | 0.10145                        | 303.00               | 0.9993                 | 2.08027                        |
| 303.14                                    | 2.4977                 | 0.16185                        | 303.15                                             | 2.5002                 | 0.23302                        | 303.00               | 2.4991                 | 2.91362                        |
| 303.15                                    | 4.9967                 | 0.32320                        | 303.14                                             | 4.9977                 | 0.45426                        | 303.00               | 4.9995                 | 3.93052                        |
| CO <sub>2</sub> — Desorption              |                        |                                |                                                    |                        |                                |                      |                        |                                |
| 303.15                                    | 4.9969                 | 0.32320                        | 303.22                                             | 4.9977                 | 0.45426                        | 301.48               | 4.9995                 | 3.93052                        |
| 303.15                                    | 2.4986                 | 0.16217                        | 303.12                                             | 2.4988                 | 0.23521                        | 303.13               | 2.4981                 | 2.92678                        |
| 303.16                                    | 0.9979                 | 0.06580                        | 303.14                                             | 0.9988                 | 0.10321                        | 303.14               | 0.9984                 | 2.09284                        |
| 303.13                                    | 0.7485                 | 0.05030                        | 303.14                                             | 0.7489                 | 0.08030                        | 303.15               | 0.7480                 | 1.90402                        |
| 303.14                                    | 0.4992                 | 0.03431                        | 303.13                                             | 0.4985                 | 0.05698                        | 303.15               | 0.4982                 | 1.69546                        |
| 303.15                                    | 0.0000                 | 0.00000                        | 303.16                                             | 0.0000                 | 0.00000                        | 303.14               | 0.0000                 | 0.00000                        |

## X Ray Diffraction Analysis - XRD

The XRD patterns were measured using a Malvern Panalytical Empyrean X-ray diffractometer (Cu  $K\alpha$  radiation at 0.154184 nm) equipped with a Ni filter and a PIXcel3D detector. The data were collected over a range of  $5^\circ$  to  $40^\circ$  ( $2\theta$ ), with a scan speed of  $0.5^\circ \text{ min}^{-1}$  and a step width of  $0.02^\circ$ .

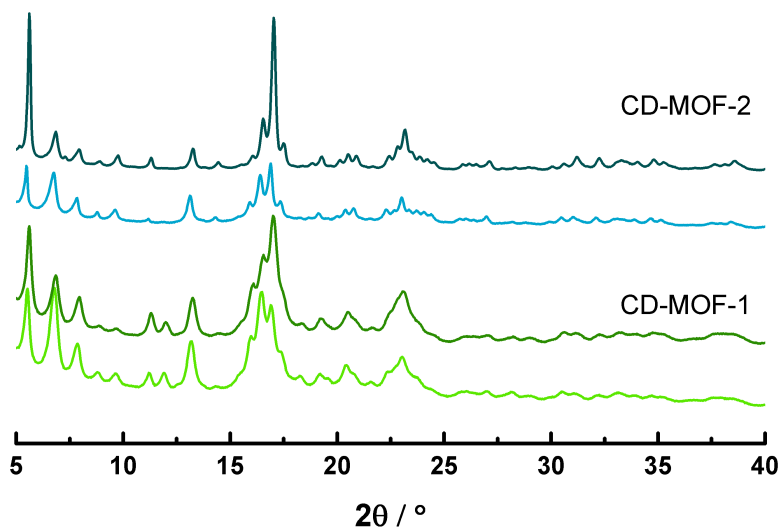

Figure S8: XRD of CD-MOF-1 and CD-MOF-2 before (dark green and dark blue for CD-MOF-1 and CD-MOF-2, respectively) and after grinding (light green and light blue for CD-MOF-1 and CD-MOF-2, respectively) under Argon atmosphere.

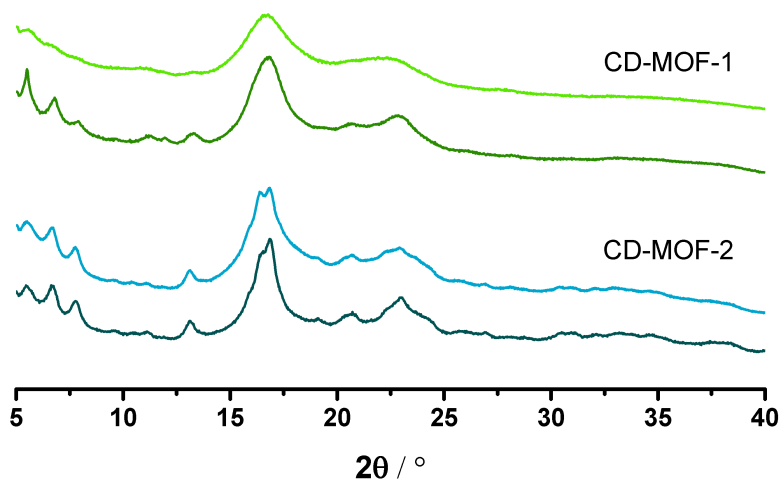

Figure S9: XRD of CD-MOF-1 and CD-MOF-2 before (dark green and dark blue for CD-MOF-1 and CD-MOF-2, respectively) and after grinding (light green and light blue for CD-MOF-1 and CD-MOF-2, respectively) under atmospheric conditions.

## Small-angle X-ray scattering

Small-angle X-ray scattering (SAXS) measurements were carried out on an X-ray scattering instrument XENOCS Xeuss 3.0. The experiments were performed at a wavelength of 1.542 Å. Glass capillaries of 1 mm containing pure ionic liquids and their respective suspensions with 5 % w/w ZIF-8 were prepared and sealed with the aid of a flame, all of which were subsequently checked using a primary vacuum line. The capillaries were placed in the sample holder and the chamber was evacuated to 0.1 mbar vacuum to allow the detector to get closer to the samples and to limit parasitic diffusion maintaining a good signal to noise ratio. The sample to SAXS detector distance was 94.8 mm, recording a  $q$  range of 0.01–2.5 Å<sup>−1</sup>, and the measurements acquired during 3600 s. After the acquisition, beamline-specific corrections were applied to the SAXS images and the intensity was radially averaged to yield intensity as a function of the wavevector. An empty capillary was also recorded in the same conditions and subtracted from all the samples. Data treatment was performed using XSACT 2.10.3 software.

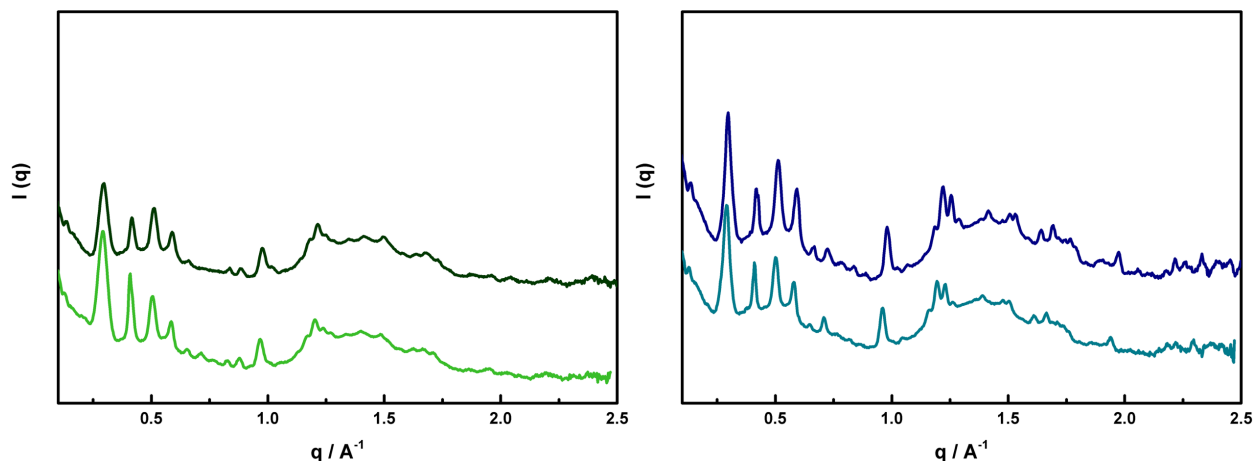

Figure S10: SAXS structure factor of CD-MOF-1 and CD-MOF-2 in  $[P_{6,6,6,14}][NTf_2]$  freshly prepared (light green and light blue for CD-MOF-1 and CD-MOF-2, respectively) and 60 days after the preparation (dark green and dark blue for CD-MOF-1 and CD-MOF-2, respectively).



## Turbiscan measurements

The sedimentation of the suspensions was examined using a Turbiscan Classic MA 2000 apparatus. Approximately 6.0 mL of suspensions were prepared by mixing CD-MOF-1 or CD-MOF-2 and  $[P_{6,6,6,14}][NTf_2]$ . The samples were prepared inside an Argon glovebox. Then, they were removed from the inert atmosphere and transferred to the cylindrical tubes designed for this Turbiscan model. Measurements were taken at intervals of 10, 20, and 30 minutes, as well as after some hours and several days following preparation. All measurements were conducted at room temperature.

Figure S11 displays the transmittance over time, using CD-MOF-1 as an example, at different heights within the Turbiscan tube — specifically, near the bottom (7 mm), in the middle (25 mm), and at the top (43 mm). This plot allows us to observe how transmittance varies at these heights over time. Near the bottom of the tube, the initial transmittance is around 18 %, remaining relatively constant during the first three hours. However, after 20 hours, there is a slight increase, with transmittance rising from 18 % to 22 %. This value continues to rise gradually, reaching 46 % in the last measurement taken ten days after sample preparation. In contrast, the transmittance at the top of the bottle also starts at approximately 19 %, similar to the bottom. Yet, after three hours, a significant increase occurs, with transmittance rising from 19 % to 28 %. After 20 h getting around 60 % and after 3 days already up to 90 %. When measurements are taken from the middle of the tube, the variation in transmittance is only slightly different compared to the bottom of the tube. After ten days, the transmittance reaches a value of 53 %, which is significantly lower than the 98 % observed at the top of the tube. This indicates that even after ten days at an average height along the tube, a substantial amount of particles remains present. Overall, these measurements illustrate the differences in transmittance changes over time at various heights within the cylindrical glass tube. Transmittance also enables us to measure the sediment thickness at the bottom of the tube.

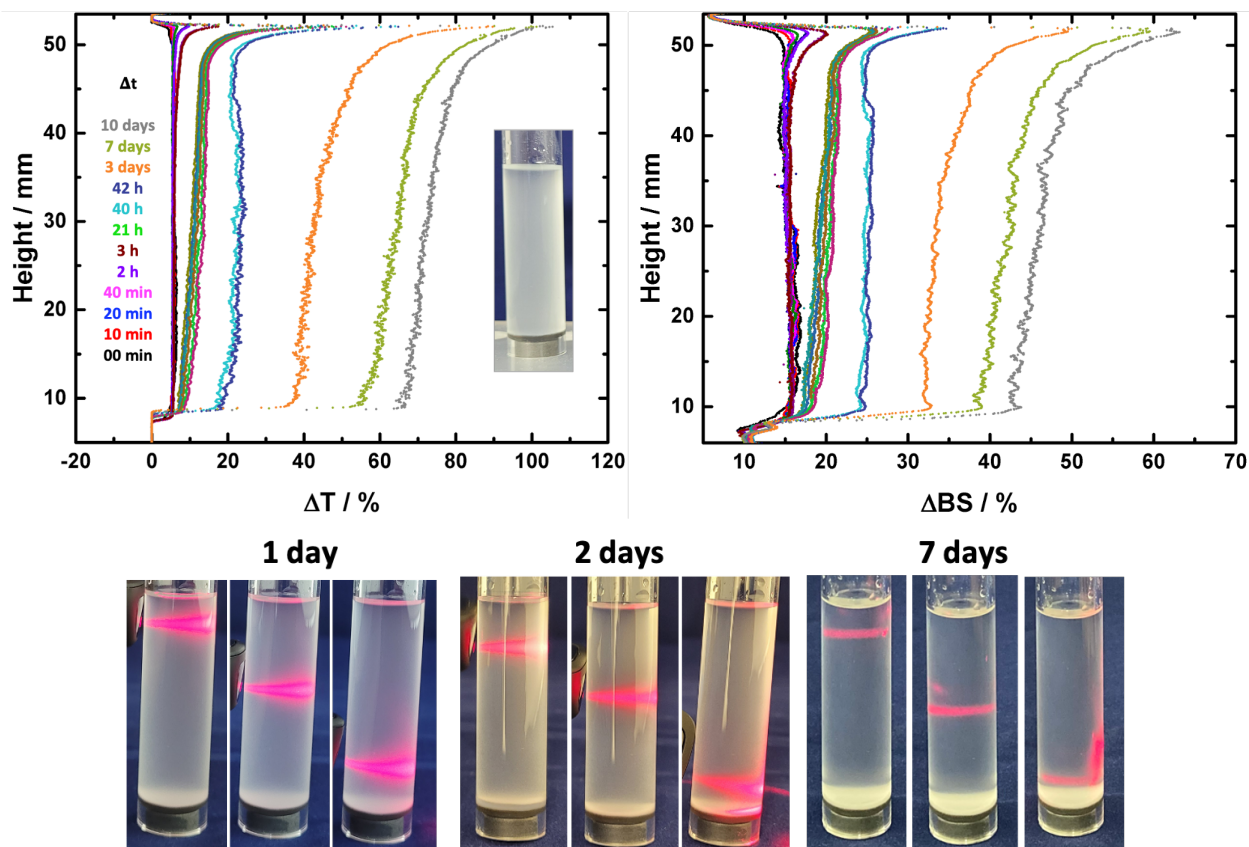

Figure S11: Turbiscan measurements of a suspension containing  $\approx 1.0$  % w/w of CD-MOF-2 in  $[P_{6,6,6,14}][NTf_2]$  transmittance and back scattering over time.

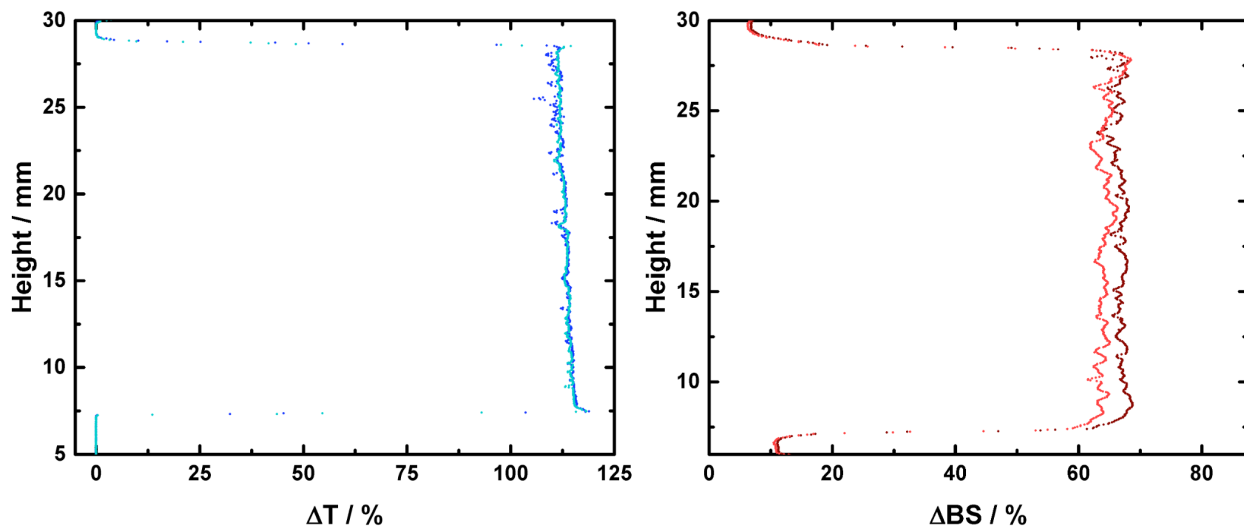

Figure S12: Turbiscan measurements of a pure ionic liquid  $[P_{6,6,6,14}][NTf_2]$  transmittance and back scattering for time zero and after 2 hours.

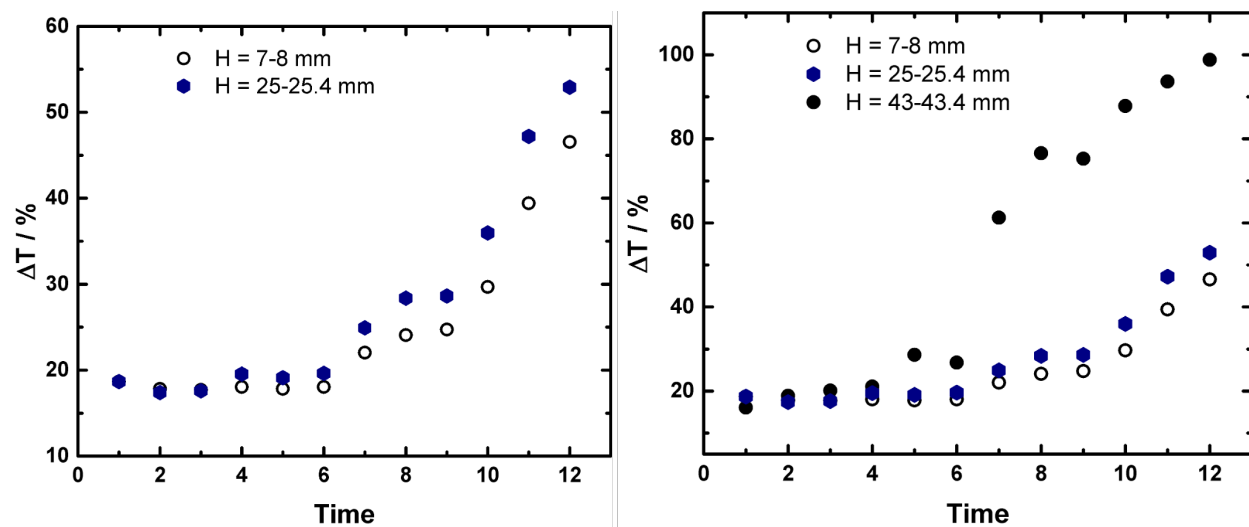

Figure S13: Transmittance over time at three different heights for CD-MOF-1 in  $[P_{6,6,6,14}][NTf_2]$ : 7-8 mm at the bottom, 25-25.4 in the middle and 43-43.4 at the top of the Turbiscan vial. The times represented by increasing numbers (1, 2, 3...) represent the times: zero minutes, 10 minutes, 20 minutes, 40 minutes, 2 hour, 3 hours, 20 hours, 40 hours, 42 hours, 3 days, 7 days and 10 days. (Left): only  $H = 7-8$  mm and 25-25.4 mm and (right): all heights, in order to facilitate the visualization.

## Dynamic Light Scattering

DLS measurements were performed in a Malvern Zetasizer Nano ZS at 298 K. The data were collected at the angle of  $173^\circ$  in the backscatter mode and were processed using the general purpose normal resolution option and using extend duration for large particles with relaxation time multiplier of  $10^5$ . The samples were prepared in Argon inert atmosphere by adding 1.92 mg or 1.94 mg of CD-MOF-1 or CD-MOF-2 in 1.028918 g or 1.05341 g of  $[P_{6,6,6,14}][NTf_2]$ , respectively, resulting in a concentration of approximately 2 mg/mL.

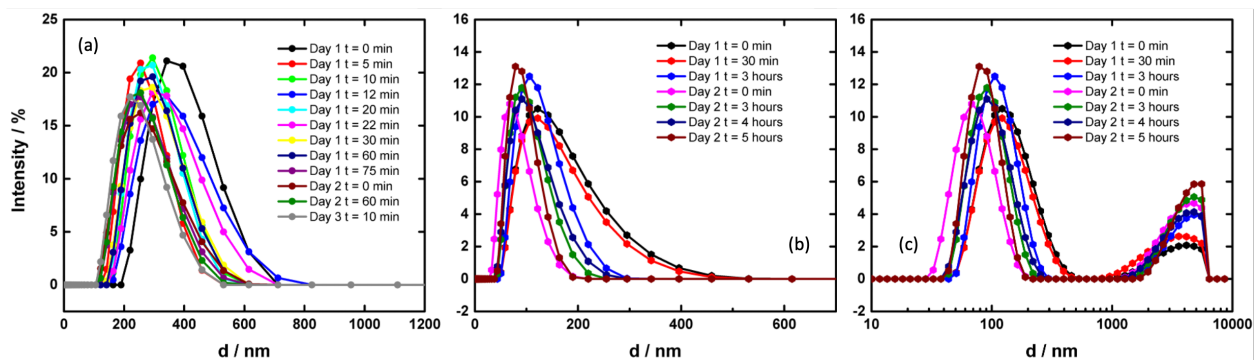

Figure S14: Dynamic light scattering of (a) CD-MOF-2 and (b-c) CD-MOF-1 PoILs in  $[P_{6,6,6,14}][NTf_2]$  at 2 mg mL<sup>-1</sup> concentration and 298 K.

## Nuclear magnetic resonance

The Nuclear Magnetic Resonance (NMR) spectra of  $^1\text{H}$  and  $^{13}\text{C}$  were measured on a 400 MHz Bruker Avance III spectrometer. The equipment has a broadband Prodigy probe 5mm  $^1\text{H}$ -X gradient Z at 298 K.

In the NMR spectra shown below, we can observe the upper phase containing the ionic liquid after complete phase separation of the suspension prepared with CD-MOF-2 (after 48 days, Figure SX). Therefore, we can observe that the spectra only show signals related to the hydrogens and carbons present in the structure of the ionic liquid, with no signals related to the solubilization of CD-MOF in the ionic liquid.<sup>3</sup>

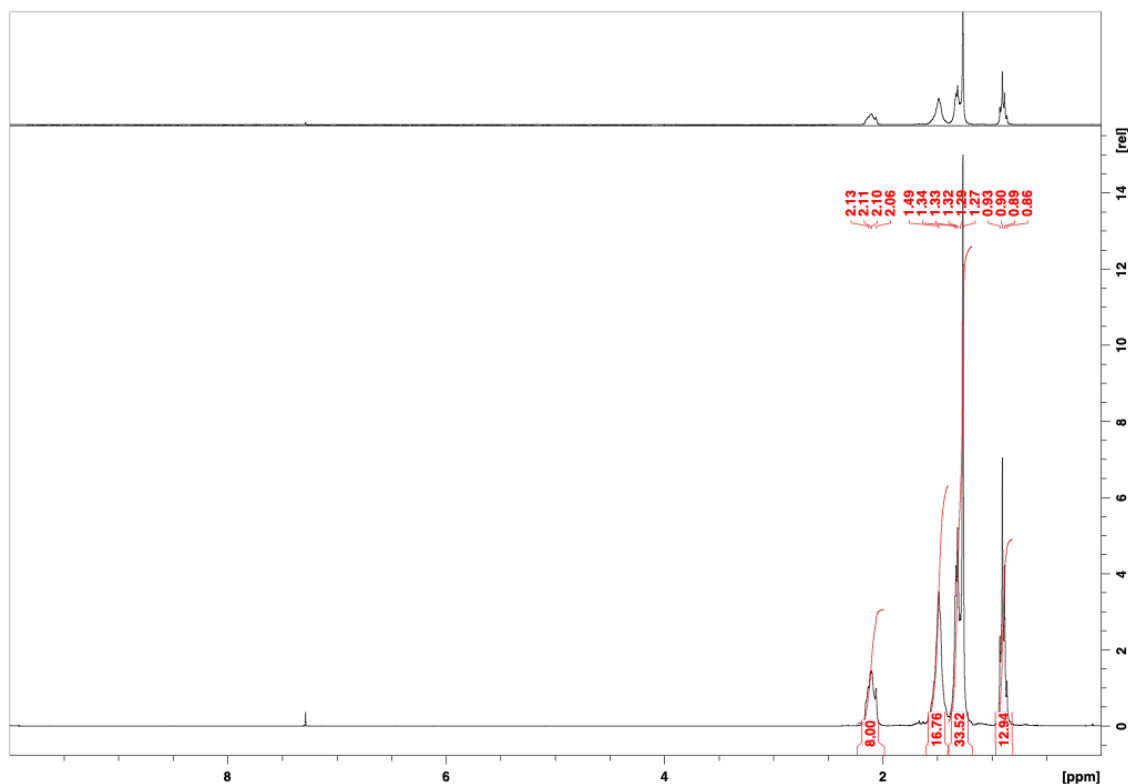

Figure S15:  $^1\text{H}$  NMR of the upper phase of PoIL  $[\text{P}_{6,6,6,14}][\text{NTf}_2]$  and CD-MOF-2 after complete phase separation in  $\text{CDCl}_3$ .

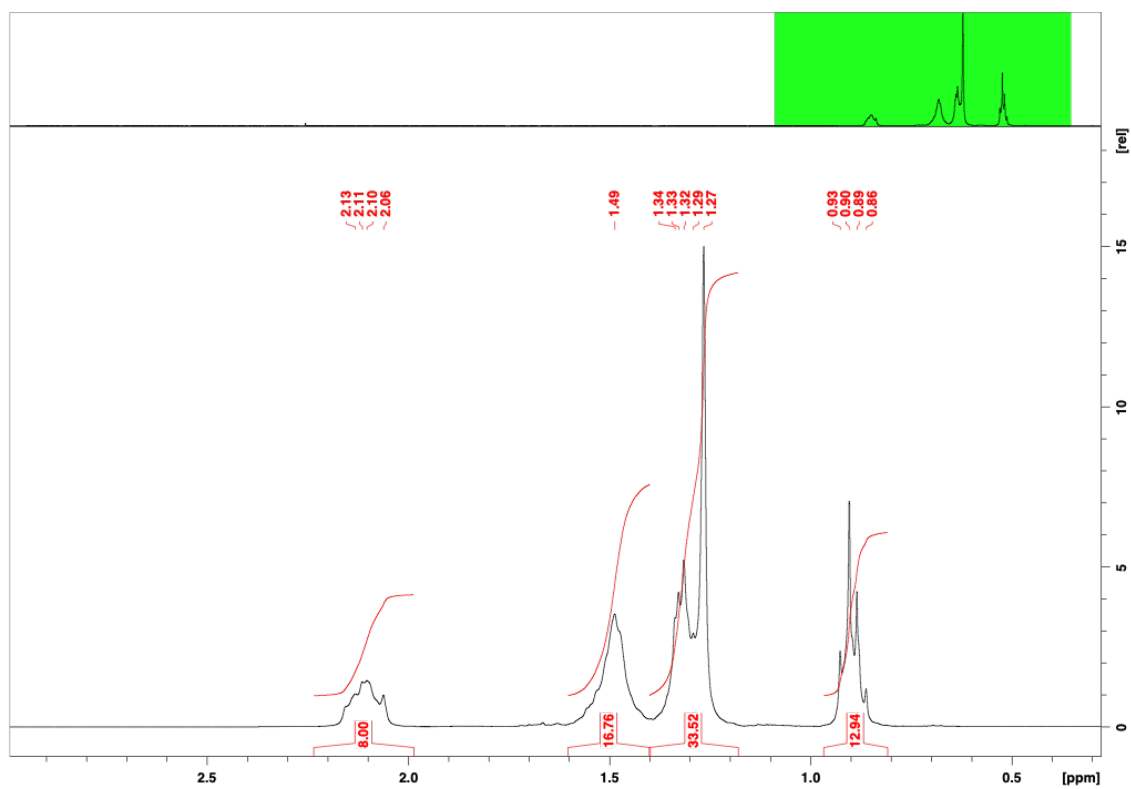

Figure S16:  $^1\text{H}$  NMR of the upper phase of PoIL  $[\text{P}_{6,6,6,14}][\text{NTf}_2]$  and CD-MOF-2 after complete phase separation (Zoom: 0-3 ppm) in  $\text{CDCl}_3$ .

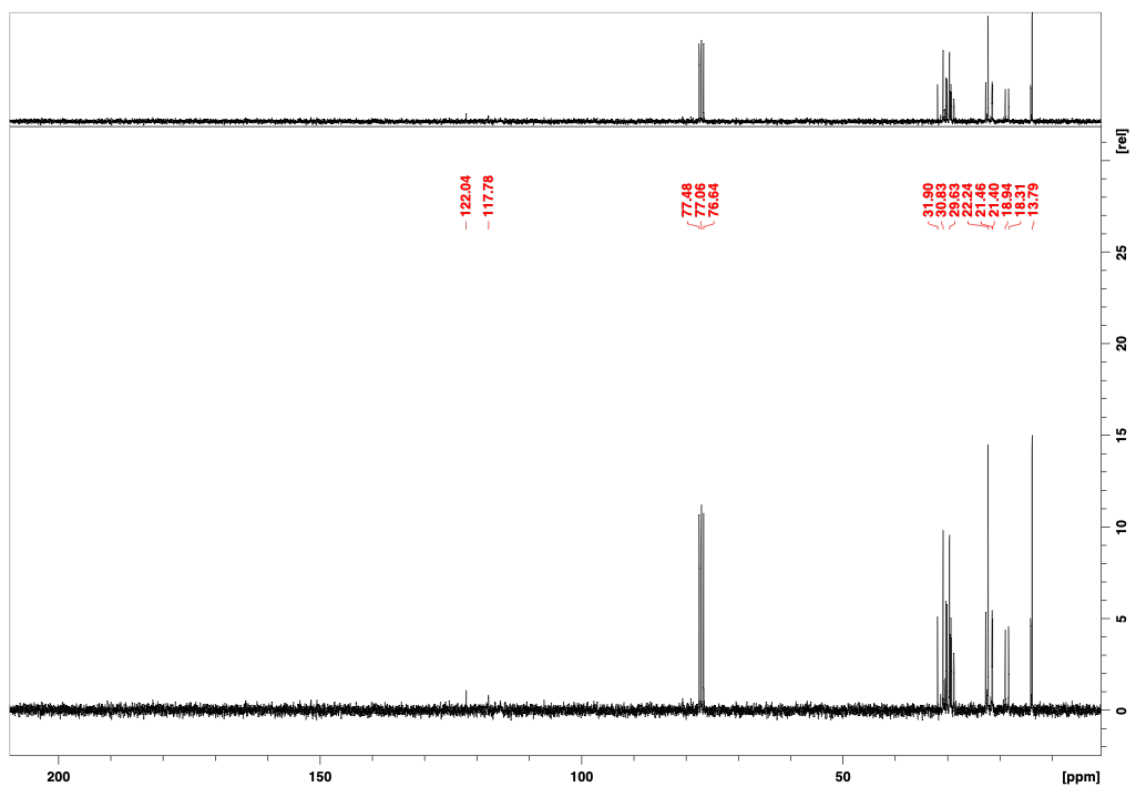

Figure S17:  $^{13}\text{C}$  NMR of the upper phase of PoIL  $[\text{P}_{6,6,6,14}][\text{NTf}_2]$  and CD-MOF-2 after complete phase separation in  $\text{CDCl}_3$ .

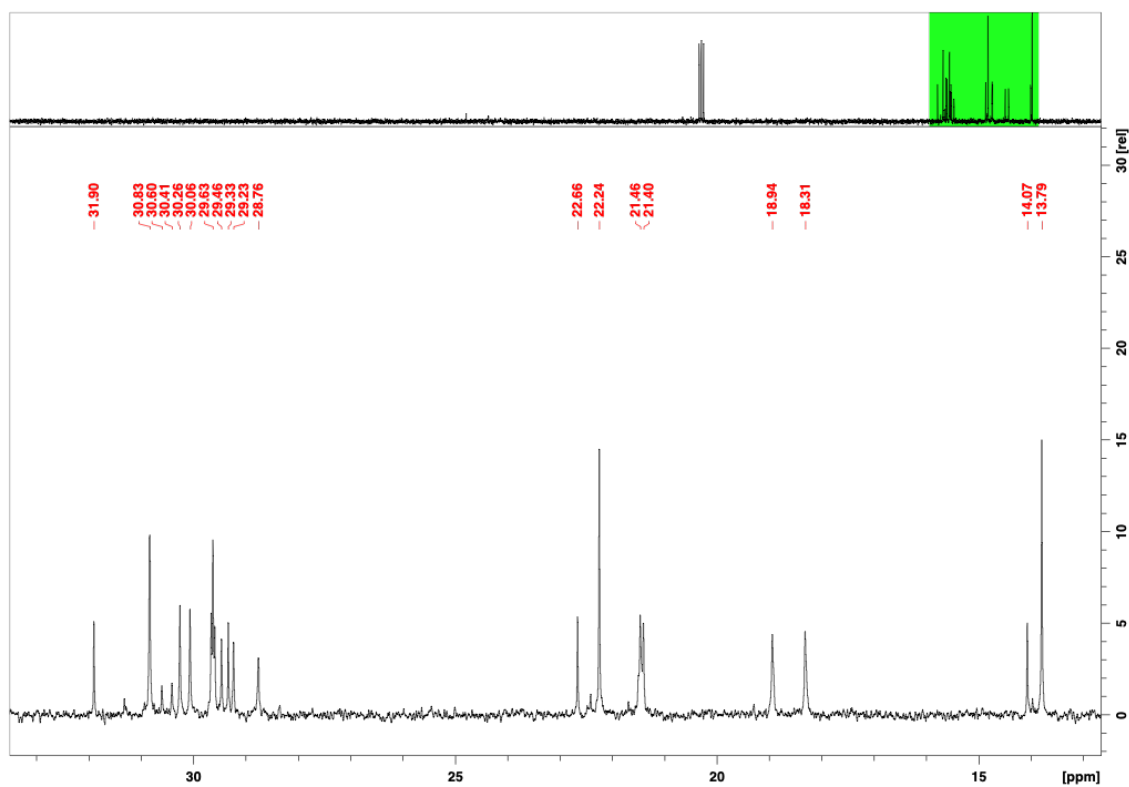

Figure S18:  $^{13}\text{C}$  NMR of the upper phase of PoIL  $[\text{P}_{6,6,6,14}][\text{NTf}_2]$  and CD-MOF-2 after complete phase separation (Zoom: 13-33 ppm) in  $\text{CDCl}_3$ .



## References

- (1) Avila, J.; Červinka, C.; Dugas, P.-Y.; Pádua, A. A.; Costa Gomes, M. Porous ionic liquids: Structure, stability, and gas absorption mechanisms. *Advanced Materials Interfaces* **2021**, *8*, 2001982.
- (2) Avila, J.; Clark, R.; Pádua, A. A.; Gomes, M. C. Porous ionic liquids: beyond the bounds of free volume in a fluid phase. *Mater. Adv.* **2022**, *3*, 8848–8863.
- (3) Arkhipova, E. A.; Ivanov, A. S.; Reshetko, S. S.; Aleshin, D. Y.; Maslakov, K. I.; Kupreenko, S. Y.; Savilov, S. V. Transport properties of nitrile and carbonate solutions of [P66614][NTf 2] ionic liquid, its thermal degradation and non-isothermal kinetics of decomposition. *Physical Chemistry Chemical Physics* **2021**, *23*, 23909–23921.
